# Supplementary material for: Variation in the mineral element concentration of Moringa oleifera Lam. and M. stenopetala (Bak. f.) Cuf.: Role in human nutrition
Source: PLOS journal article supplement (doi:10.1371/journal.pone.0175503), 2017-04-07
Supplement: S8 (10.1371/journal.pone.0175503.s008) [file journal.pone.0175503.s008]

**S8 Table. Levene's test of homogeneity of variances of MO leaves elemental concentration by localities in Kenya based on mean and median. D.f. 1 is the degree of freedom of the numerator, and d.f. 2 is the degree of freedom of the denominator.**

| Element |                                      | Levene Statistic | d.f. 1 | d.f. 2 | p     |
|---------|--------------------------------------|------------------|--------|--------|-------|
| Ca      | Based on Mean                        | 1.402            | 4      | 51     | 0.247 |
|         | Based on Median                      | 0.585            | 4      | 51     | 0.675 |
|         | Based on Median and with adjusted df | 0.585            | 4      | 22     | 0.677 |
|         | Based on trimmed mean                | 1.146            | 4      | 51     | 0.346 |
| Cu      | Based on Mean                        | 1.18             | 4      | 51     | 0.331 |
|         | Based on Median                      | 1.06             | 4      | 51     | 0.386 |
|         | Based on Median and with adjusted df | 1.06             | 4      | 37     | 0.390 |
|         | Based on trimmed mean                | 1.164            | 4      | 51     | 0.338 |
| I       | Based on Mean                        | 8.953            | 4      | 51     | 0.000 |
|         | Based on Median                      | 1.835            | 4      | 51     | 0.136 |
|         | Based on Median and with adjusted df | 1.835            | 4      | 14     | 0.177 |
|         | Based on trimmed mean                | 5.764            | 4      | 51     | 0.001 |
| Fe      | Based on Mean                        | 4.08             | 4      | 51     | 0.006 |
|         | Based on Median                      | 2.673            | 4      | 51     | 0.042 |
|         | Based on Median and with adjusted df | 2.673            | 4      | 10     | 0.093 |
|         | Based on trimmed mean                | 3.209            | 4      | 51     | 0.020 |
| Mg      | Based on Mean                        | 0.045            | 4      | 51     | 0.996 |
|         | Based on Median                      | 0.089            | 4      | 51     | 0.985 |
|         | Based on Median and with adjusted df | 0.089            | 4      | 40     | 0.985 |
|         | Based on trimmed mean                | 0.057            | 4      | 51     | 0.994 |
| Zn      | Based on Mean                        | 4.831            | 4      | 51     | 0.002 |
|         | Based on Median                      | 4.157            | 4      | 51     | 0.005 |
|         | Based on Median and with adjusted df | 4.157            | 4      | 35     | 0.007 |
|         | Based on trimmed mean                | 4.729            | 4      | 51     | 0.003 |
| Se      | Based on Mean                        | 2.582            | 4      | 51     | 0.048 |
|         | Based on Median                      | 1.527            | 4      | 51     | 0.208 |
|         | Based on Median and with adjusted df | 1.527            | 4      | 33     | 0.217 |
|         | Based on trimmed mean                | 2.19             | 4      | 51     | 0.083 |
